# Supplementary material for: Negative Regulation of ULK1 by microRNA-106a in Autophagy Induced by a Triple Drug Combination in Colorectal Cancer Cells In Vitro
Source: MDPI journal article supplement (doi:10.3390/genes12020245), 2021-02-09
Supplement: s1 [file s1]

Supplementary Materials:

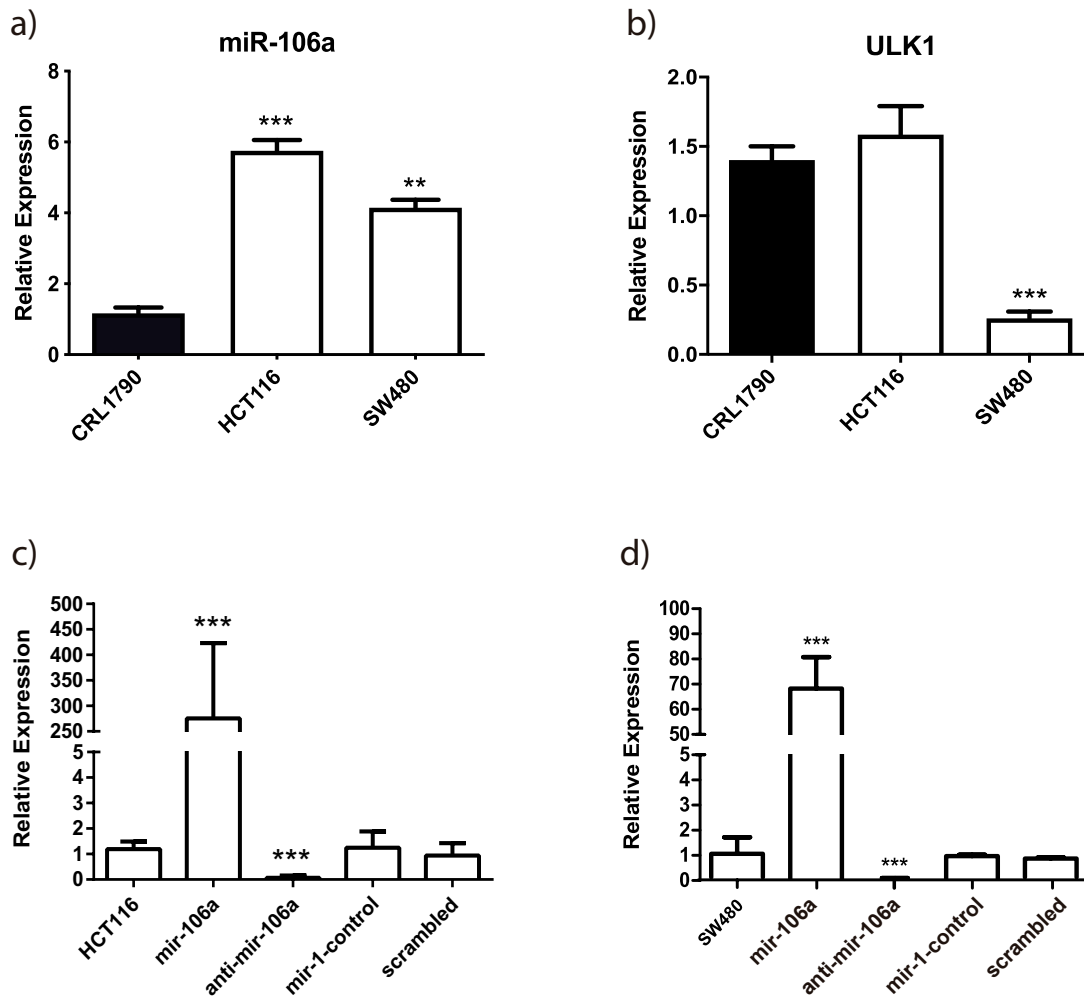

**Figure S4.** a) and b) Expression of mir-106a and ULK1 in HCT116 and SW480 (CRC cell lines) compared with CRL1790 (normal cells), normalized with RNU6 or GAPDH, respectively. \*\*\* $p < 0.001$ , \*\* $p < 0.01$ . c) and d) Successful transfection of mir-106a mimic, inhibitor and controls was detected by means of qPCR in HCT116 and SW480 cells. \*\*\*( $p < 0.001$ ).
