# Supplementary material for: Negative Regulation of ULK1 by microRNA-106a in Autophagy Induced by a Triple Drug Combination in Colorectal Cancer Cells In Vitro
Source: MDPI journal article supplement (doi:10.3390/genes12020245), 2021-02-09
Supplement: s1 [file s1]

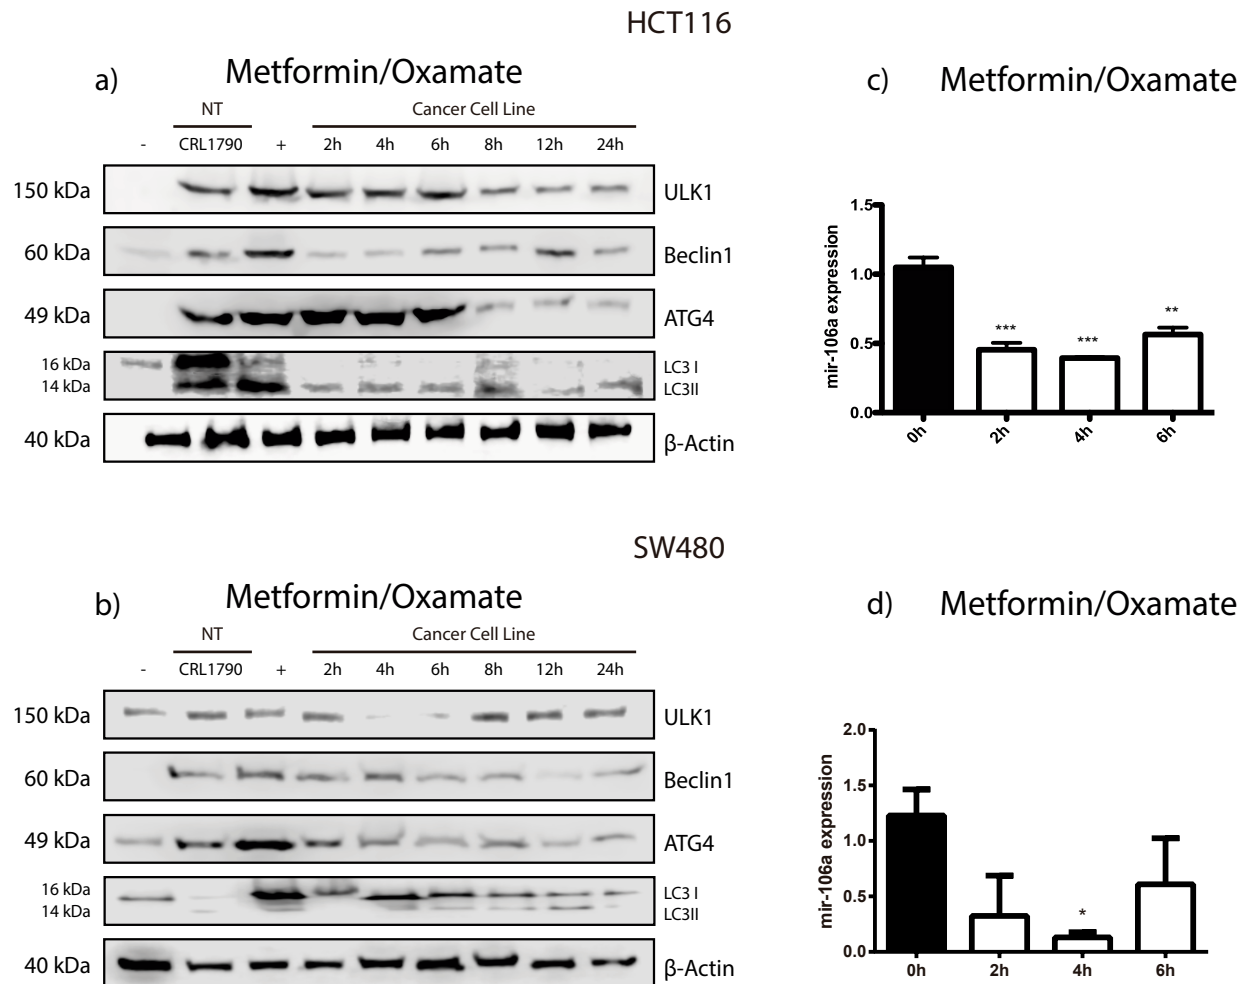

**Figure S2.** Detection of the proteins involved in the autophagy process in CRL1790 (non-tumor cell line) and HCT116 and SW480 cell lines (negative control=basal cells); positive control rapamycin was used (10 $\mu$ M). Western blot analysis was performed to measure autophagic flux at 2, 4, 6, 8, 12 and 24 hours of exposure a) and b) Metformin/Oxamate.  $\beta$ -actin was used as loading control. Correlation of miR-106a expression with the protein level expression of ULK1 in the HCT116 and SW480 cell lines. Quantitative real- time PCR shows a slight decrease in miR-106a in exposure to c) and d) Metformin/Oxamate. MiR-106a levels were calculated through the  $\Delta\Delta C_t$  method and normalized relative to U6 snRNA. Data are presented as means  $\pm$  SD. \* $p < 0.05$ , \*\* $p < 0.01$ , \*\*\* $p < 0.001$ , respectively.
