# Supplementary material for: Negative Regulation of ULK1 by microRNA-106a in Autophagy Induced by a Triple Drug Combination in Colorectal Cancer Cells In Vitro
Source: MDPI journal article supplement (doi:10.3390/genes12020245), 2021-02-09
Supplement: s1 [file s1]

Supplementary Materials:

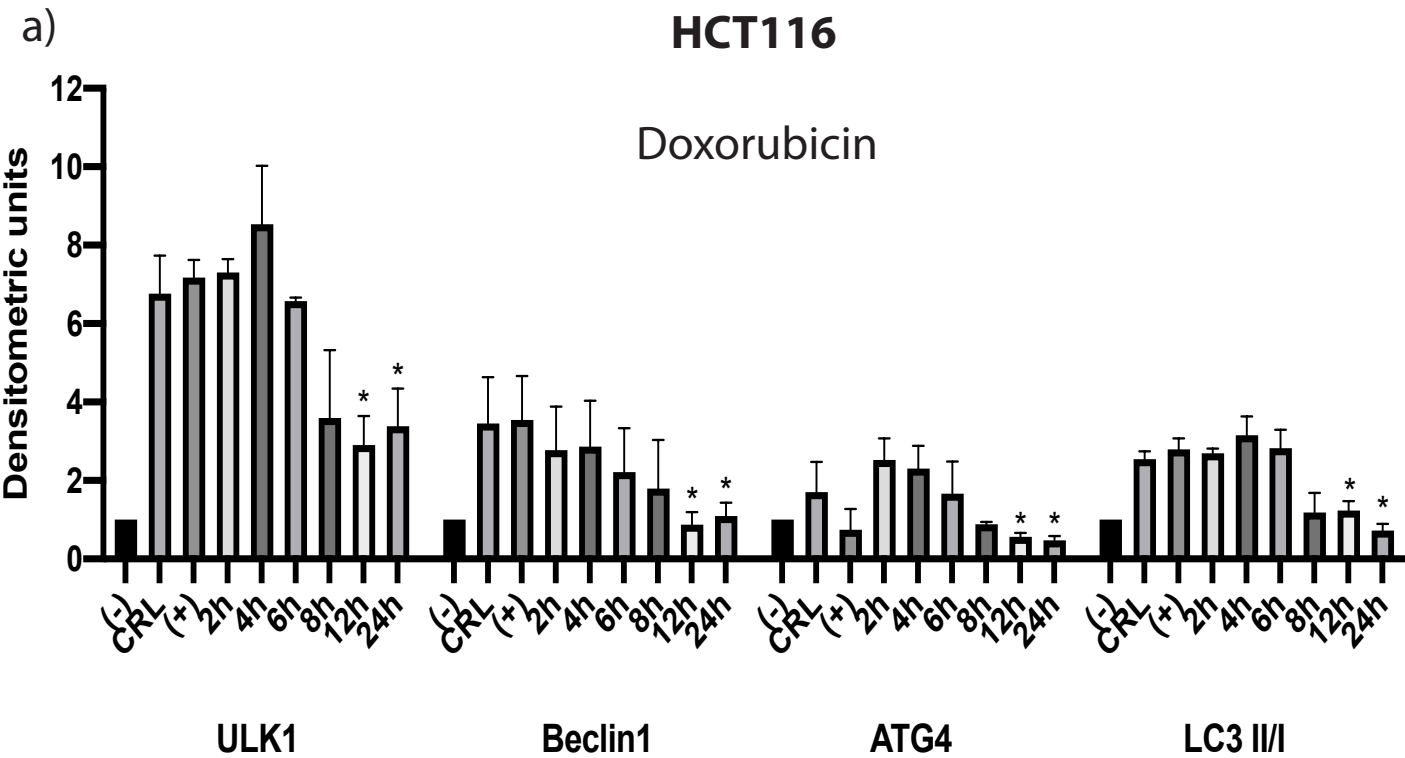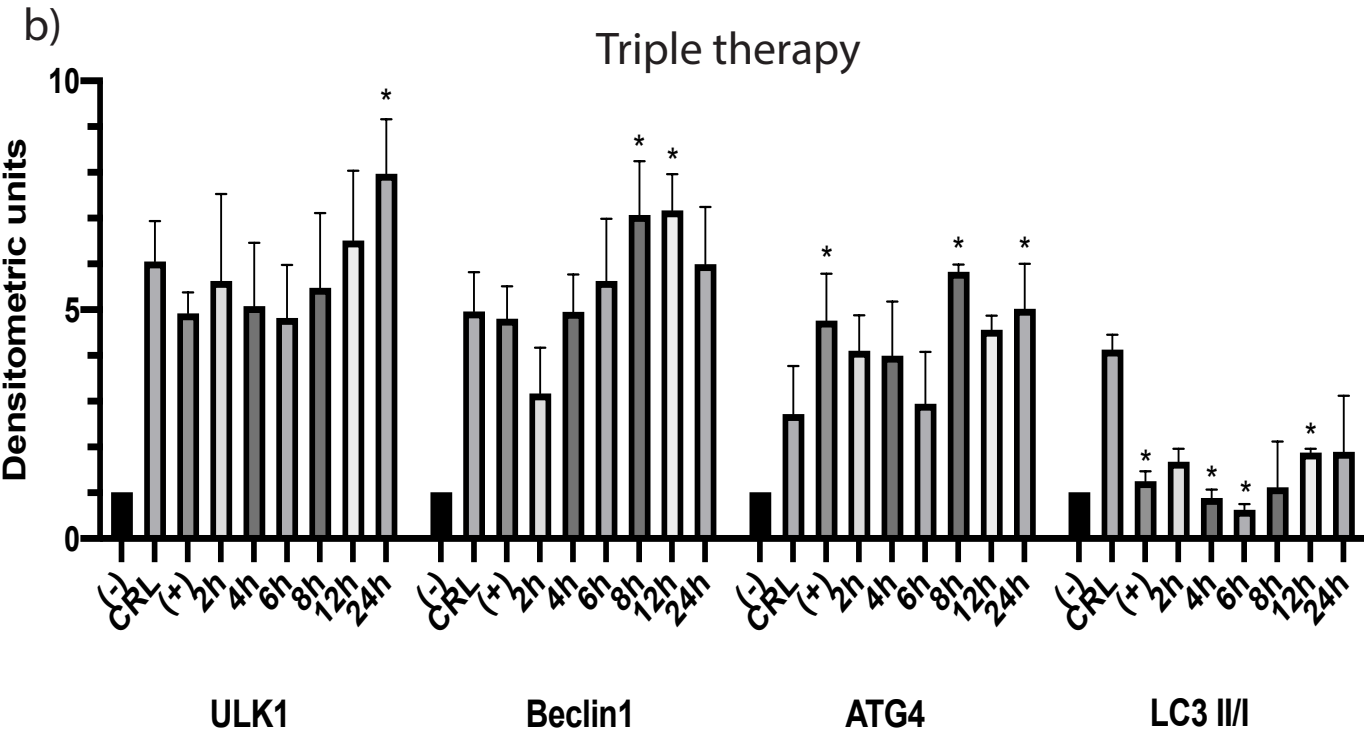

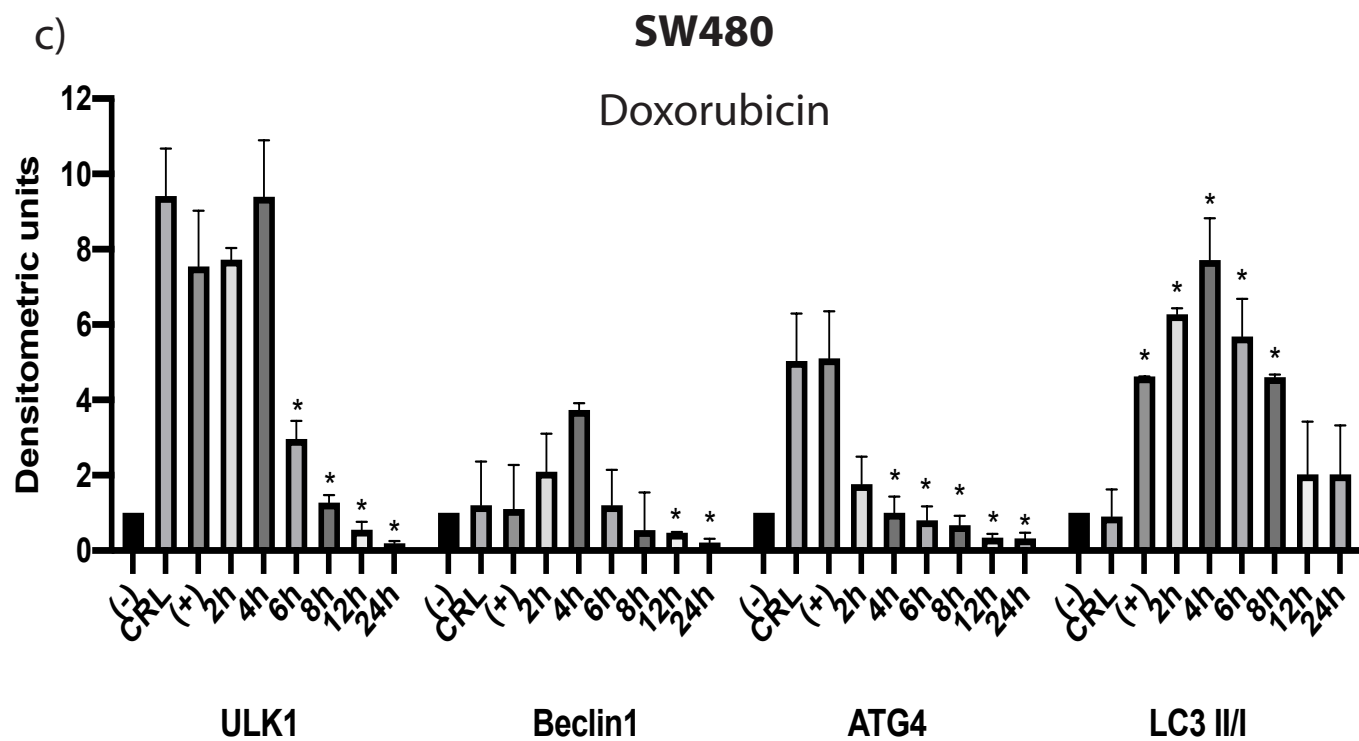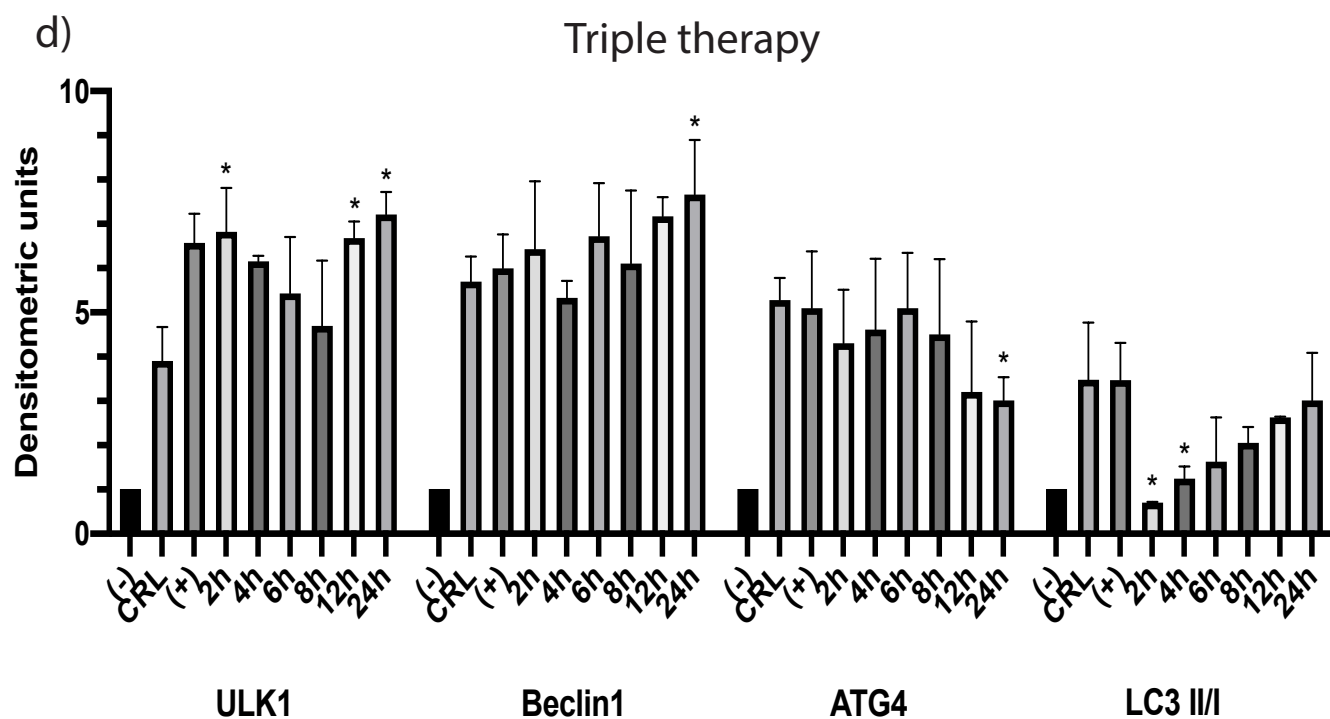

**Figure S1.** Densitometry graphs of the proteins involved in autophagy in HCT116 and SW480 CRC cell lines. a) and c) Doxorubicin: b) and d) triple therapy. Data are presented as means  $\pm$  SD. \* $p < 0.05$ . Cells treated with doxorubicin decreases overtime, while the detection of the same proteins increases after treated with triple therapy.
