# Supplementary material for: Negative Regulation of ULK1 by microRNA-106a in Autophagy Induced by a Triple Drug Combination in Colorectal Cancer Cells In Vitro
Source: MDPI journal article supplement (doi:10.3390/genes12020245), 2021-02-09
Supplement: s1 [file s1]

## Supplementary Materials

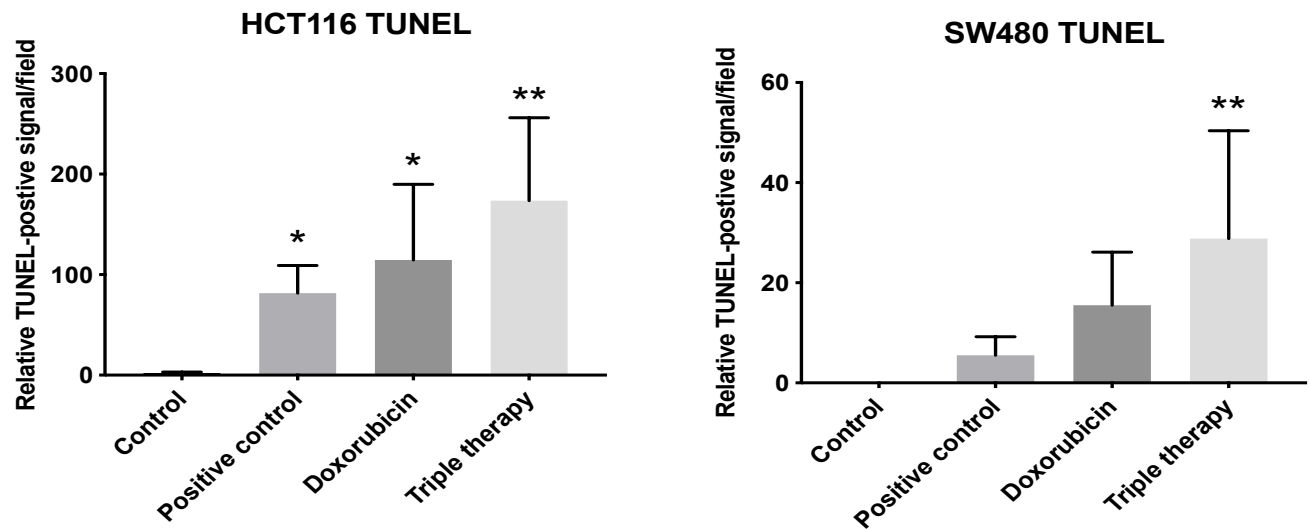

**Figure S3.** Statistical results of TUNEL. TUNEL-positive cells in HCT116 and SW480 were evaluated by using ImageJ software. \* $p < 0.05$ , \*\* $p < 0.01$ .
